# Supplementary material
Source: Springer Nature journal article supplement (https://www.springermedizin.de/resource/supplementary/12958_2009_528_MOESM4_ESM.pdf/9568218)

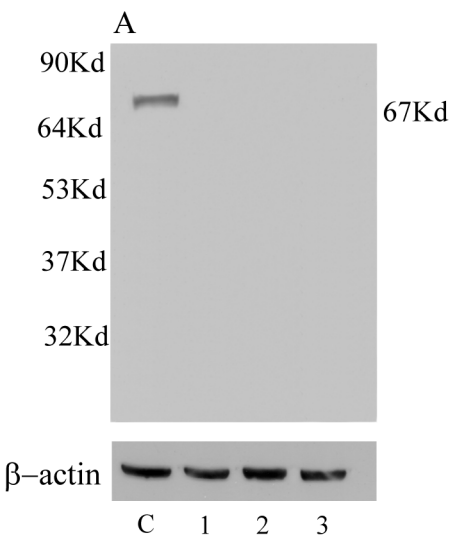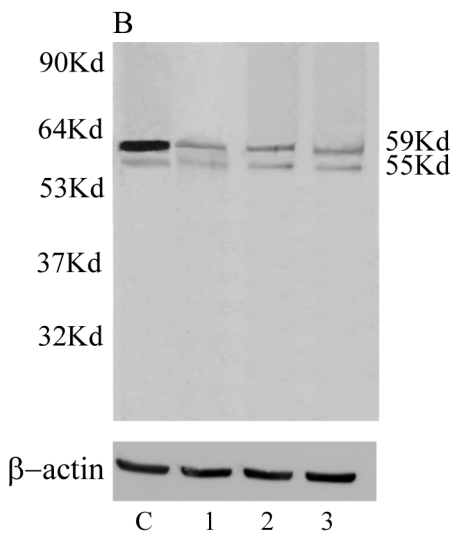

Supplement: MOESM4 [file 9568218]
